# Supplementary material
Source: Research Square preprint supplement (doi:10.21203/rs.3.rs-8883556/v1)
Supplement: Supplementary file 1 [file 2adbfbe97fde50ded6734e27.docx]

Table S1.Validation of ERA5-Land reanalysis data against Meteorological station observations

| Station | Variable | Bias | RMSE | R | NSE | Station | | Variable | Bias | RMSE | R | NSE |
| --- | --- | --- | --- | --- | --- | --- | --- | --- | --- | --- | --- | --- |
| Al-Ahsa | Precipitation | -1.02 | 8.42 | 0.79 | 0.61 | | Wadi Al-Dawasser | Precipitation | -0.34 | 5.83 | 0.61 | 0.35 |
| Tmin | -1.67 | 1.80 | 1.00 | 0.94 | | Tmin | -0.85 | 1.08 | 1.00 | 0.97 |
| Tmax | -1.75 | 1.80 | 1.00 | 0.96 | | Tmax | -1.52 | 1.58 | 1.00 | 0.95 |
| Al-Olaa | Precipitation | -3.74 | 9.08 | 0.85 | 0.33 | | Al-Baha | Precipitation | 1.11 | 16.84 | 0.62 | 0.28 |
| Tmin | -4.53 | 4.59 | 0.99 | 0.57 | | Tmin | -1.49 | 1.63 | 0.99 | 0.89 |
| Tmax | -2.12 | 2.14 | 1.00 | 0.92 | | Tmax | -0.75 | 0.90 | 0.99 | 0.96 |
| Hafr Al-Batin | Precipitation | 0.02 | 9.78 | 0.83 | 0.70 | | Bisha | Precipitation | -2.41 | 11.17 | 0.71 | 0.44 |
| Tmin | -0.42 | 0.83 | 1.00 | 0.99 | | Tmin | -0.95 | 1.34 | 0.99 | 0.95 |
| Tmax | -1.07 | 1.26 | 1.00 | 0.98 | | Tmax | -1.58 | 1.70 | 0.99 | 0.88 |
| KFIA | Precipitation | -0.73 | 9.35 | 0.83 | 0.68 | | Gizan | Precipitation | -2.10 | 22.67 | 0.76 | 0.56 |
| Tmin | -0.16 | 0.62 | 1.00 | 0.99 | | Tmin | 0.49 | 0.99 | 0.96 | 0.89 |
| Tmax | -1.09 | 1.20 | 1.00 | 0.98 | | Tmax | -2.70 | 2.75 | 0.98 | 0.07 |
| Madinah | Precipitation | -1.69 | 8.71 | 0.71 | 0.48 | | Khamis Mushait | Precipitation | 12.61 | 25.03 | 0.71 | 0.10 |
| Tmin | -3.49 | 3.60 | 0.99 | 0.71 | | Tmin | 0.58 | 0.98 | 0.98 | 0.93 |
| Tmax | -1.15 | 1.27 | 1.00 | 0.97 | | Tmax | -1.49 | 1.74 | 0.97 | 0.79 |
| Qaisumah | Precipitation | 0.16 | 8.74 | 0.88 | 0.77 | | Najran | Precipitation | -3.98 | 12.88 | 0.77 | 0.35 |
| Tmin | -1.30 | 1.43 | 1.00 | 0.97 | | Tmin | -1.77 | 2.02 | 0.99 | 0.88 |
| Tmax | -1.68 | 1.75 | 1.00 | 0.97 | | Tmax | -2.49 | 2.55 | 0.99 | 0.75 |
| Arafat | Precipitation | -2.90 | 15.30 | 0.53 | 0.25 | | Sharorah | Precipitation | -3.93 | 13.13 | 0.48 | 0.08 |
| Tmin | -1.15 | 1.40 | 0.99 | 0.89 | | Tmin | -1.41 | 1.65 | 0.99 | 0.92 |
| Tmax | -3.31 | 3.36 | 0.99 | 0.53 | | Tmax | -2.37 | 2.43 | 1.00 | 0.82 |
| Dawadami | Precipitation | -0.65 | 8.01 | 0.92 | 0.85 | | Al-Jouf | Precipitation | -0.86 | 5.62 | 0.89 | 0.78 |
| Tmin | -0.82 | 0.93 | 1.00 | 0.98 | | Tmin | -2.21 | 2.33 | 1.00 | 0.91 |
| Tmax | -1.40 | 1.45 | 1.00 | 0.96 | | Tmax | -1.54 | 1.62 | 1.00 | 0.97 |
| Gassim | Precipitation | -2.16 | 13.04 | 0.77 | 0.58 | | Arar | Precipitation | 0.20 | 8.00 | 0.77 | 0.59 |
| Tmin | -1.10 | 1.31 | 1.00 | 0.97 | | Tmin | -1.28 | 1.42 | 1.00 | 0.97 |
| Tmax | -1.55 | 1.73 | 1.00 | 0.96 | | Tmax | -2.04 | 2.21 | 1.00 | 0.95 |
| Hail | Precipitation | 0.97 | 8.42 | 0.76 | 0.45 | | Guriat | Precipitation | -0.02 | 6.43 | 0.65 | 0.41 |
| Tmin | -0.17 | 0.98 | 0.99 | 0.98 | | Tmin | 0.40 | 0.71 | 1.00 | 0.99 |
| Tmax | -1.18 | 1.24 | 1.00 | 0.98 | | Tmax | -1.72 | 1.78 | 1.00 | 0.96 |
| Jeddah KAIA | Precipitation | 1.18 | 10.36 | 0.66 | 0.36 | | Rafha | Precipitation | 0.99 | 7.96 | 0.77 | 0.50 |
| Tmin | -1.07 | 1.59 | 0.95 | 0.81 | | Tmin | -0.52 | 1.16 | 0.99 | 0.98 |
| Tmax | -1.58 | 1.78 | 0.98 | 0.77 | | Tmax | -1.63 | 1.80 | 1.00 | 0.96 |
| Makkah | Precipitation | 2.49 | 16.93 | 0.58 | 0.07 | | Tabuk | Precipitation | -0.79 | 5.79 | 0.67 | 0.38 |
| Tmin | -3.36 | 3.44 | 0.99 | 0.28 | | Tmin | -2.43 | 2.62 | 1.00 | 0.87 |
| Tmax | -2.73 | 2.83 | 0.99 | 0.63 | | Tmax | -1.13 | 1.18 | 1.00 | 0.98 |
| Riyadh | Precipitation | -1.13 | 8.20 | 0.82 | 0.66 | | Turaif | Precipitation | 0.41 | 6.32 | 0.80 | 0.61 |
| Tmin | -1.02 | 1.27 | 0.99 | 0.97 | | Tmin | -0.40 | 0.63 | 1.00 | 0.99 |
| Tmax | -1.38 | 1.51 | 1.00 | 0.97 | | Tmax | -0.91 | 1.00 | 1.00 | 0.99 |
| Taif | Precipitation | 0.31 | 15.30 | 0.70 | 0.48 | Wejh | | Precipitation | 0.36 | 6.70 | 0.71 | 0.43 |
| Tmin | -0.18 | 1.08 | 0.98 | 0.96 | Tmin | 0.36 | 0.60 | 0.99 | 0.98 |
| Tmax | -1.41 | 1.49 | 1.00 | 0.90 | Tmax | -0.65 | 1.24 | 0.98 | 0.88 |


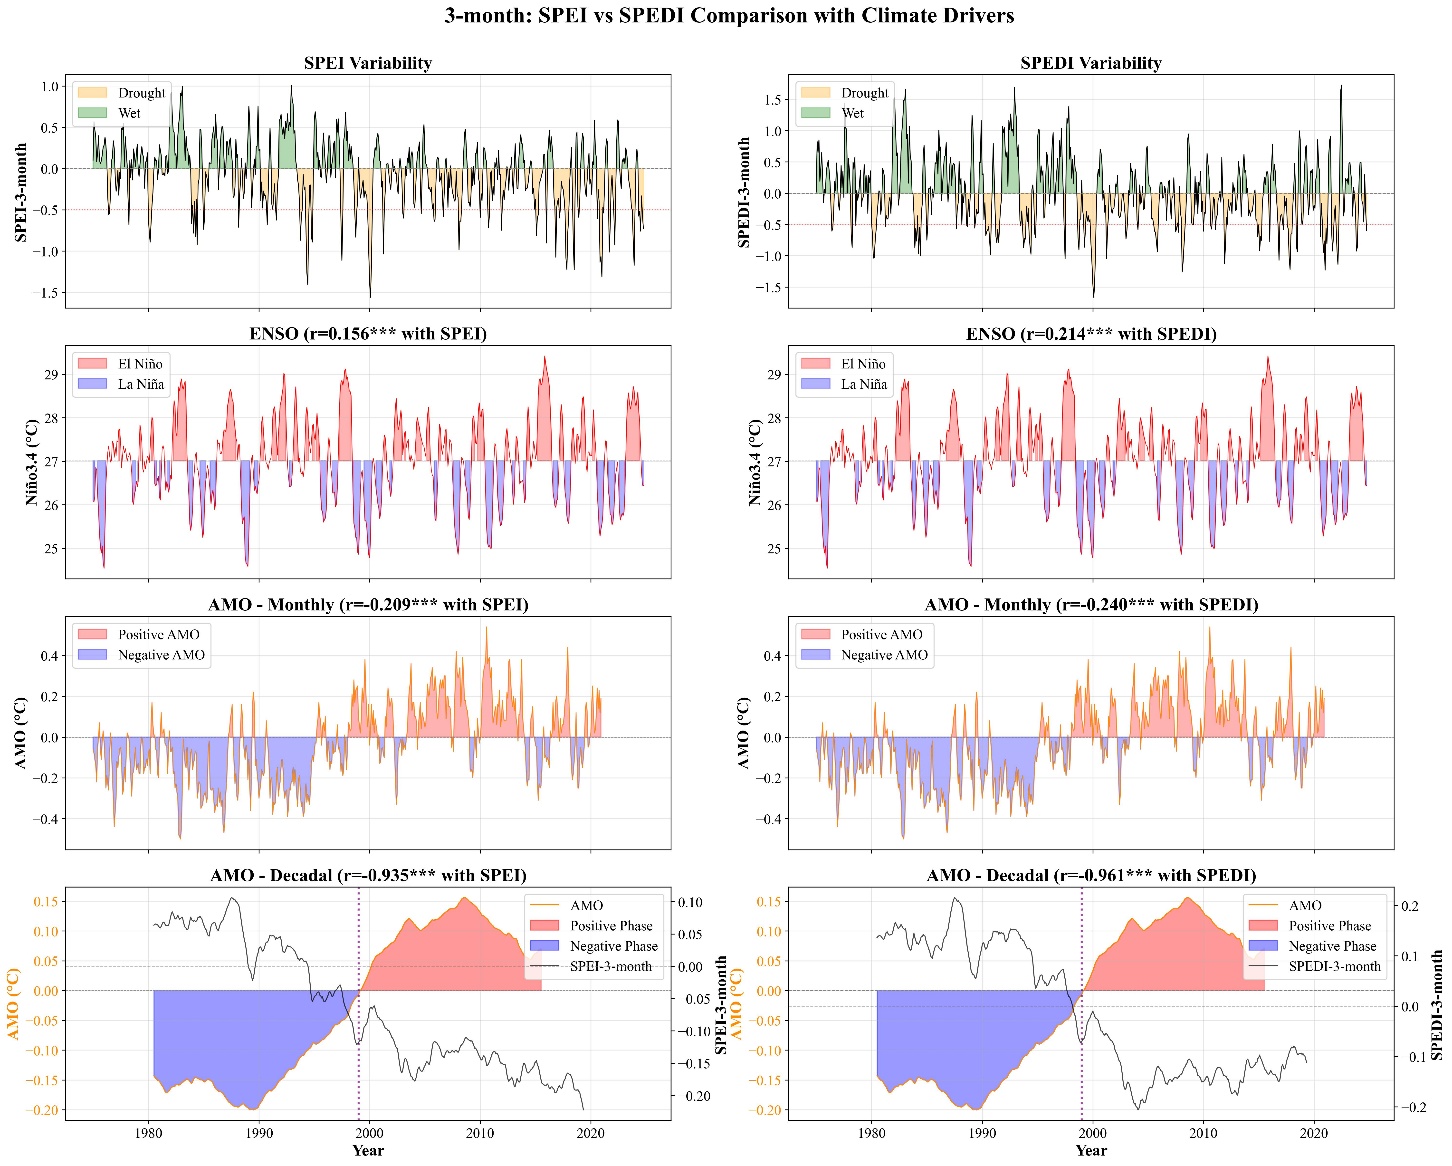


Figure S1.Comparison of 3-month SPEI and SPEDI variability with ENSO (Niño3.4 SST anomalies) and both monthly and decadal phases of the AMO over the Arabian Peninsula


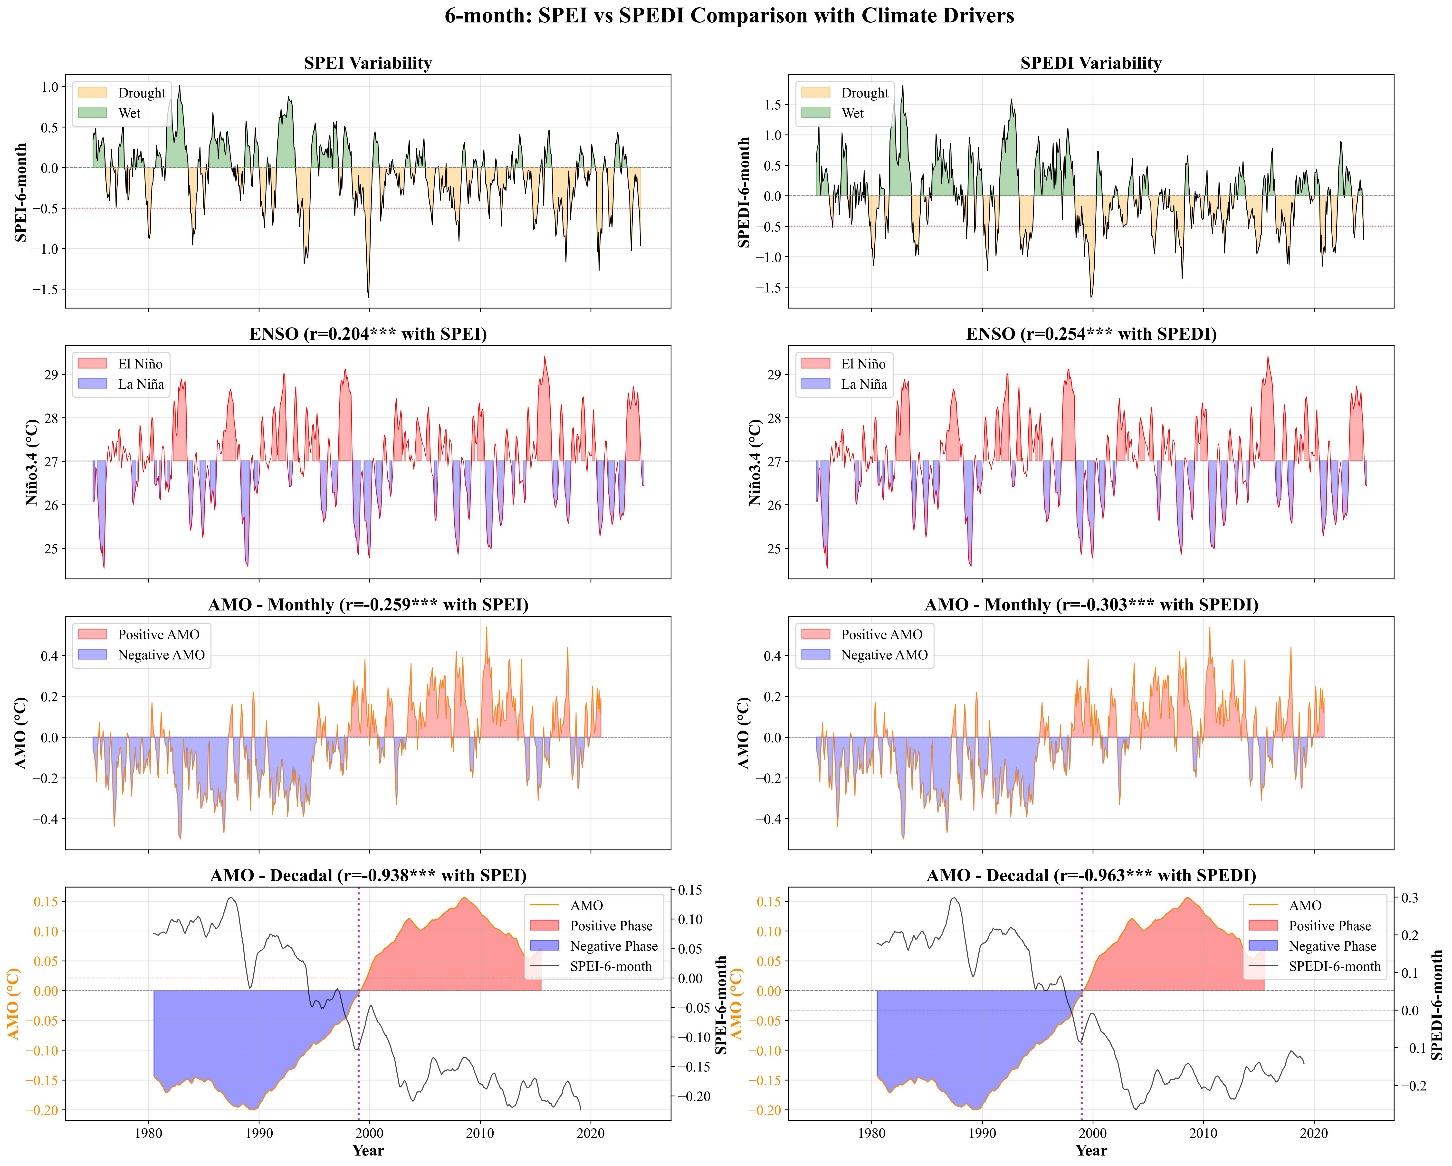


Figure S2.Comparison of 6-month SPEI and SPEDI variability with ENSO (Niño3.4 SST anomalies) and both monthly and decadal phases of the AMO over the Arabian Peninsula
